# Supplementary material for: Interfacial seed-assisted FAPbI3 crystallization and phase stabilization enhance the performance of all-air-processed perovskite solar cells
Source: Royal Society of Chemistry journal article supplement (doi:10.1039/d4dt03120b), 2025-01-01
Supplement: d4dt03120b1.pdf [file d4dt03120b1.pdf]

## Supporting Information

### **Interfacial seed-assisted FAPbI<sub>3</sub> crystallization and phase stabilization enhances the performance of all-air-processed perovskite solar cells**

*Yuan Liu<sup>a</sup>, Xingyuan Zhou<sup>a</sup>, Yupei Wu<sup>a</sup>, Hongwei Zhang<sup>a</sup> and Kun Cao<sup>a,\*</sup>*

<sup>a</sup> State Key Laboratory of Organic Electronics and Information Displays & Institute of Advanced Materials (IAM), School of Materials Science and Engineering, Nanjing University of Posts & Telecommunications, 9 Wenyuan Road, Nanjing 210023, China.

\* Corresponding author. E-mail: iamkcao@njupt.edu.cn

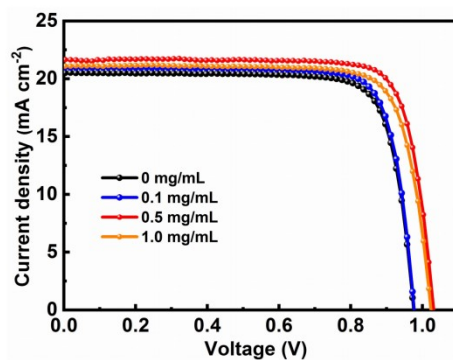

**Figure S1.** *J-V* curves of the perovskite solar cells based on FAPbI<sub>3</sub> films treated with different concentrations (0, 0.1, 0.5, and 1.0 mg/mL) of CsPbI<sub>3</sub> nanocrystals.

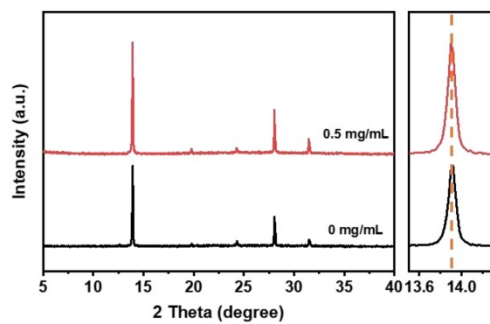

**Figure S2.** XRD patterns of the control (0 mg/mL) and target (0.5 mg/mL) perovskite films.

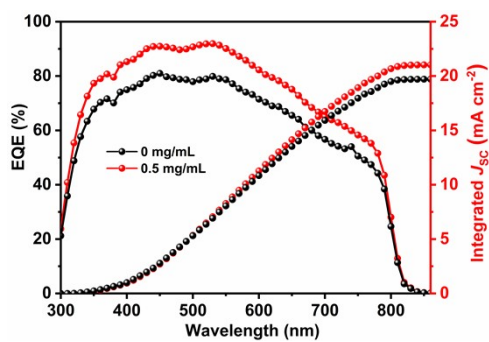

**Figure S3.** The EQE spectrum of the champion PSC based on the FAPbI<sub>3</sub> film treated with 0.5 mg/mL CsPbI<sub>3</sub> nanocrystals.

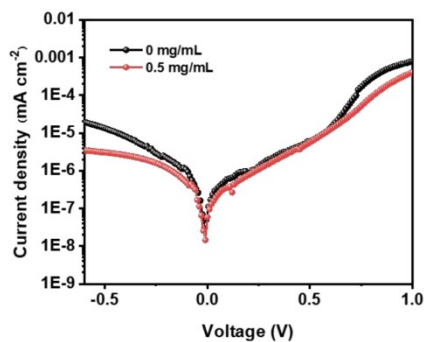

**Figure S4.** Dark  $J$ - $V$  curves of the control (0 mg/mL) and target (0.5 mg/mL) PSCs.

**Table S1.** Photovoltaic performance parameters of the control (0 mg/mL) and target (0.5 mg/mL) PSCs.

| Device  | Scanning mode | $V_{oc}$ (V) | $J_{sc}$ (mA/cm <sup>2</sup> ) | FF (%) | PCE (%) |
|---------|---------------|--------------|--------------------------------|--------|---------|
| Control | foward        | 0.95         | 19.97                          | 74.26  | 14.09   |
|         | reverse       | 0.97         | 20.52                          | 79.88  | 15.90   |
| Target  | foward        | 1.02         | 21.24                          | 79.11  | 17.14   |
|         | reverse       | 1.03         | 21.69                          | 80.75  | 18.04   |
